# Supplementary material for: Economic analysis of cloud-based desktop virtualization implementation at a hospital
Source: Springer Nature journal article supplement (doi:10.1186/1472-6947-12-119), 2012-10-30
Supplement: 12911_2012_582_MOESM1_ESM.pdf [file 12911_2012_582_MOESM1_ESM.pdf]

**Appendix for the investment costs and benefit of Virtual Desktop Infrastructure (VDI) Implementation**

Table A shows the investment costs for Virtual Desktop Infrastructure (VDI) implementation at Seoul National University Bundang Hospital (SNUBH). The initial implementation cost is the actual investment amount that arose when VDI was implemented at SNUBH. The operation and maintenance costs include the software annual license (for the use of virtual desktop access), and the operation and maintenance cost was computed as the 7% of the hardware and software cost.

**Table A. VDI Investment Costs.**

**Unit: US\$1,000**

|                                             | Item                                                            | Cost |
|---------------------------------------------|-----------------------------------------------------------------|------|
| Initial implementation cost                 | Hardware cost                                                   | 347  |
|                                             | Software cost                                                   | 93   |
|                                             | Initial outsourcing implementation cost                         | 159  |
|                                             | Total implementation cost                                       | 599  |
| Operation and maintenance cost (five years) | Ongoing support and maintenance cost                            | 62   |
|                                             | Software annual license (for the use of virtual desktop access) | 232  |
|                                             | Total operation and maintenance cost                            | 294  |
| Total costs                                 |                                                                 | 893  |

Table B shows the annual gains of four benefit items resulting from the VDI implementation.

**Table B. VDI Benefits.**

**Unit: US\$1,000**

| Item                                                                                       | Value |
|--------------------------------------------------------------------------------------------|-------|
| A: Benefits due to reduced PC errors and difficulties (consulting rooms)                   | 208   |
| B: Benefits due to reduced PC errors and difficulties (places other than consulting rooms) | 27    |
| C: Benefits due to reduced time for application and OS updates                             | 3     |
| D: Benefits due to reduced account management time                                         | 0.5   |
| Total increase in revenue (A)                                                              | 208   |
| Total cost savings (B+C+D)                                                                 | 31    |
| Total benefits                                                                             | 239   |
